CORRECTION

# Correction: Self-Regulation of Anterior Insula with Real-Time fMRI and Its Behavioral Effects in Obsessive-Compulsive Disorder: A Feasibility Study

**Korhan Buyukturkoglu, Hans Roettgers, Jens Sommer, Mohit Rana, Leonie Dietzsch, Ezgi Belkis Arikan, Ralf Veit, Rahim Malekshahi, Tilo Kircher, Niels Birbaumer, Ranganatha Sitaram, Sergio Ruiz**

There is an affiliation error. The affiliation for the 11<sup>th</sup> author is not indicated. Ranganatha Sitaram is not affiliated with #2 but instead is affiliated with #7: Institute of Medical and Biological Engineering, School of Engineering, and Department of Psychiatry and Section of Neuroscience, School of Medicine. Pontificia Universidad Catolica de Chile, Santiago, Chile.

## Reference

1. Buyukturkoglu K, Roettgers H, Sommer J, Rana M, Dietzsch L, Arikan EB, et al. (2015) Self-Regulation of Anterior Insula with Real-Time fMRI and Its Behavioral Effects in Obsessive-Compulsive Disorder: A Feasibility Study. PLoS ONE 10(8): e0135872. doi: [10.1371/journal.pone.0135872](https://doi.org/10.1371/journal.pone.0135872) PMID: [26301829](https://pubmed.ncbi.nlm.nih.gov/26301829/)

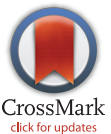

## OPEN ACCESS

**Citation:** Buyukturkoglu K, Roettgers H, Sommer J, Rana M, Dietzsch L, Arikan EB, et al. (2015) Correction: Self-Regulation of Anterior Insula with Real-Time fMRI and Its Behavioral Effects in Obsessive-Compulsive Disorder: A Feasibility Study. PLoS ONE 10(12): e0145027. doi:10.1371/journal.pone.0145027

**Published:** December 16, 2015

**Copyright:** © 2015 Buyukturkoglu et al. This is an open access article distributed under the terms of the [Creative Commons Attribution License](https://creativecommons.org/licenses/by/4.0/), which permits unrestricted use, distribution, and reproduction in any medium, provided the original author and source are credited.
